1 **Title:** “How do we do this at a distance?!” A descriptive study of remote undergraduate research  
2 programs during COVID-19

3  
4 **Type of manuscript:** Article

5  
6 **Number of characters:** 68,683

7  
8 **Running title:** Remote undergraduate research in COVID-19

9  
10 **Authors:** Olivia A. Erickson<sup>1</sup>, Rebecca B. Cole<sup>2</sup>, Jared M. Isaacs<sup>1</sup>, Silvia Alvarez-Clare<sup>3</sup>, Jonathan  
11 Arnold<sup>4</sup>, Allison Augustus-Wallace<sup>5</sup>, Joseph C. Ayoob<sup>6</sup>, Alan Berkowitz<sup>7</sup>, Janet Branchaw<sup>8</sup>, Kevin R.  
12 Burgio<sup>7,9</sup>, Charles H. Cannon<sup>3</sup>, Ruben Michael Ceballos<sup>10</sup>, C. Sarah Cohen<sup>11</sup>, Hilary Coller<sup>12</sup>, Jane  
13 Disney<sup>13</sup>, Van A. Doze<sup>14</sup>, Margaret J. Eggers<sup>15</sup>, Stacy Farina<sup>16</sup>, Edwin L. Ferguson<sup>17</sup>, Jeffrey J. Gray<sup>18</sup>,  
14 Jean T. Greenberg<sup>17</sup>, Alexander Hoffman<sup>19</sup>, Danielle Jensen-Ryan<sup>20</sup>, Robert M. Kao<sup>21</sup>, Alex C. Keene<sup>22</sup>,  
15 Johanna E. Kowalko<sup>23</sup>, Steven A. Lopez<sup>24</sup>, Camille Mathis<sup>25</sup>, Mona Minkara<sup>26</sup>, Courtney J. Murren<sup>27</sup>,  
16 Mary Jo Ondrechen<sup>24</sup>, Patricia Ordoñez<sup>28</sup>, Anne Osano<sup>29</sup>, Elizabeth Padilla-Crespo<sup>30</sup>, Soubantika  
17 Palchoudhury<sup>31</sup>, Hong Qin<sup>32</sup>, Juan Ramírez-Lugo<sup>33</sup>, Jennifer Reithel<sup>34</sup>, Colin A. Shaw<sup>35</sup>, Amber Smith<sup>36</sup>,  
18 Rosemary Smith<sup>34,37</sup>, Adam P. Summers<sup>38</sup>, Fern Tsien<sup>39</sup>, Erin L. Dolan<sup>1</sup>

- 19  
20 1. Department of Biochemistry & Molecular Biology, University of Georgia, Athens, GA 30602  
21 2. Department of Psychology, University of Georgia, Athens, GA 30602  
22 3. Center for Tree Science, The Morton Arboretum, Lisle, IL 60532  
23 4. Department of Genetics, University of Georgia, Athens, GA 30602  
24 5. Department of Medicine & Office of Diversity & Community Engagement, Louisiana State  
25 University Health Sciences Center, New Orleans, LA 70112  
26 6. Department of Computational and Systems Biology, University of Pittsburgh School of  
27 Medicine, Pittsburgh, PA 15260  
28 7. Education Department, Cary Institute for Ecosystem Studies, Millbrook, NY 12545  
29 8. WISCIENCE and the Department of Kinesiology, University of Wisconsin-Madison, Madison,  
30 WI 53706  
31 9. New York City Audubon Society, New York, NY 10010. Department of Ecology and  
32 Evolutionary Biology, University of Connecticut, Storrs, CT 06269  
33 10. Department of Biological Sciences, University of Arkansas, Fayetteville, AR 72701  
34 11. Department of Biology, Estuary and Ocean Science Center, San Francisco State University, San  
35 Francisco, CA 94132  
36 12. Department of Molecular, Cell and Developmental Biology, University of California Los  
37 Angeles, Los Angeles, CA 90095  
38 13. Community Environmental Health Laboratory, Mt. Desert Island Biological Laboratory,  
39 Salisbury Cove, ME 04672  
40 14. Department of Biomedical Sciences, University of North Dakota, Grand Forks, ND 58202  
41 15. Department of Microbiology and Cell Biology, Montana State University, Bozeman, MT 59717  
42 16. Department of Biology, Howard University, Washington, DC 20059  
43 17. Department of Molecular Genetics and Cell Biology, The University of Chicago, Chicago, IL  
44 60637

- 45 18. Department of Chemical & Biomolecular Engineering, Johns Hopkins University, Baltimore, MD  
46 21218
- 47 19. Department of Microbiology, Immunology, and Molecular Genetics, and Institute for  
48 Quantitative and Computational Biosciences, University of California Los Angeles, Los Angeles,  
49 CA, 90095
- 50 20. Department of Math and Sciences, Laramie County Community College, Cheyenne, WY 82007
- 51 21. Science Department, College of Arts and Sciences, Heritage University, Toppenish, WA 98948
- 52 22. Department of Biological Sciences, Florida Atlantic University, Jupiter, FL 33458
- 53 23. Wilkes Honors College, Florida Atlantic University, Jupiter, FL 33458
- 54 24. Department of Chemistry & Chemical Biology, Northeastern University, Boston, MA 02115
- 55 25. Institute for Nanobiotechnology, Johns Hopkins University, Baltimore, MD 21218
- 56 26. Department of Bioengineering, Northeastern University, Boston, MA 02115
- 57 27. Department of Biology, College of Charleston, Charleston, SC, 29424
- 58 28. Department of Computer Science, University of Puerto Rico Río Piedras, San Juan, PR 00925
- 59 29. Department of Natural Sciences, Bowie State University, Bowie, MD 20715
- 60 30. Department of Science and Technology, Inter American University of Puerto Rico – Aguadilla,  
61 Aguadilla, PR 00605
- 62 31. Civil and Chemical Engineering Department, University of Tennessee at Chattanooga,  
63 Chattanooga, TN 37403-2598
- 64 32. Department of Computer Science and Engineering, Department of Biology, Geology, and  
65 Environmental Science, University of Tennessee at Chattanooga, Chattanooga, TN 37403
- 66 33. Department of Biology, University of Puerto Rico Río Piedras, San Juan, PR 00925
- 67 34. Rocky Mountain Biological Laboratory, PO Box 519, Crested Butte, CO 81224
- 68 35. Undergraduate Scholars Program and Department of Earth Sciences, Montana State University,  
69 Bozeman, MT 59717
- 70 36. Wisconsin Institute for Science Education and Community Engagement, University of  
71 Wisconsin–Madison, Madison, WI 53706
- 72 37. Department of Biological Sciences, Idaho State University, Pocatello, ID 83209
- 73 38. Friday Harbor Laboratories, Bio/SAFS, University of Washington, Friday Harbor, WA 98250
- 74 39. Department of Genetics, Louisiana State University Health Sciences Center, New Orleans, LA  
75 70112

76

77 \* **Author for Correspondence:** Erin L. Dolan, University of Georgia, Biochemistry & Molecular  
78 Biology Department, B210B Davison Life Sciences Building, Athens, GA, 30602; Email:  
79 [eldolan@uga.edu](mailto:eldolan@uga.edu); Phone: 540-250-3073

80

81 **Keywords:** undergraduate research, evaluation, remote, COVID-19

82  
83

84 **ABSTRACT**

85

86 The COVID-19 pandemic shut down undergraduate research programs across the U.S. Twenty-three sites  
87 offered remote undergraduate research programs in the life sciences during summer 2020. Given the  
88 unprecedented offering of remote research experiences, we carried out a study to describe and evaluate  
89 these programs. Using structured templates, we documented how programs were designed and  
90 implemented, including who participated. Through focus groups and surveys, we identified programmatic  
91 strengths and shortcomings as well as recommendations for improvements from the perspectives of  
92 participating students. Strengths included the quality of mentorship, opportunities for learning and  
93 professional development, and development of a sense of community. Weaknesses included limited  
94 cohort building, challenges with insufficient structure, and issues with technology. Although all programs  
95 had one or more activities related to diversity, equity, inclusion, and justice, these topics were largely  
96 absent from student reports even though programs coincided with a peak in national consciousness about  
97 racial inequities and structural racism. Our results provide evidence for designing remote REUs that are  
98 experienced favorably by students. Our results also indicate that remote REUs are sufficiently positive to  
99 further investigate their affordances and constraints, including the potential to scale up offerings, with  
100 minimal concern about disenfranchising students.

101

102

103

104

## 105 INTRODUCTION

106  
107 The global COVID-19 pandemic caused major disruptions to research and teaching across post-secondary  
108 education in 2020. Educators and the organizations that support them, ranging from education companies  
109 to professional societies to centers for teaching and learning, all scrambled to shift to online experiences  
110 for undergraduate programs. A body of knowledge about online instruction, including principles for  
111 designing and strategies for teaching online courses synchronously and asynchronously, has been  
112 available to inform these changes (e.g., Collison et al., 2000; Means et al., 2014; Palloff & Pratt, 2007).  
113 Yet, as STEM undergraduate education has shifted to maximize student involvement in research, a major  
114 gap in knowledge has been identified: how to engage undergraduates in research at a distance.

115  
116 Alternative instructional approaches have been offered up as potential solutions to afford students  
117 opportunities to think and work like scientists online or at a distance, such as by analyzing literature or  
118 carrying out virtual lab or at-home demonstration laboratory activities (Qiang et al., 2020). Although  
119 these approaches are demonstrated to promote student learning and development (e.g., Clark et al., 2009),  
120 it is questionable whether they can fully replace the educational value afforded by undergraduate research  
121 experiences in STEM. Of particular value is the role that in-person undergraduate research experiences  
122 play in facilitating student integration into the scientific community and enabling students to clarify their  
123 educational and career interests (Estrada et al., 2011; Gentile et al., 2017; Laursen et al., 2010; Lopatto &  
124 Tobias, 2010). Therefore, it was of particular concern that these experiences were relegated to remote  
125 experiences in 2020.

126  
127 Many programs are in place nationwide to offer undergraduate research experiences in the form of  
128 internships every summer. One of the longest standing and most widely recognized sources of support for  
129 these programs is the National Science Foundation (NSF). This support started in the form of the NSF  
130 Undergraduate Research Participation program, which was launched in 1958 (Neckers, 1982). The NSF  
131 URP funded projects, known as sites, recruited, selected, and hosted undergraduates as research interns  
132 working with faculty mentors and other scientists, including graduate students and postdoctoral  
133 associates. Resumed in 1987 as the Research Experiences for Undergraduates (REU) program, REU  
134 continues to be one of the largest supporters of undergraduate research experiences in the U.S. (McDevitt  
135 et al., 2017). In 2019 alone, 125 sites hosted undergraduate research programs in the biological sciences  
136 with NSF support, engaging ~1,270 undergraduates in research, 68% of whom identified as women and  
137 61% of whom identified as an under-represented minority (Sally O'Connor, NSF REU program officer,  
138 personal communication).

139  
140 About 80% of REU sites funded by the NSF Directorate for Biological Sciences opted to cancel their  
141 2020 summer REU programming due to the COVID-19 pandemic, and 20% – or 25 programs – opted to  
142 proceed. In order to document how remote REU programs transitioned to remote research experiences, 23  
143 programs, including one funded by the USDA National Institute for Food and Agriculture, collaborated to  
144 generate descriptive accounts of how their programs were designed and implemented. These programs  
145 also collaborated with an external evaluation team (OAE, RBC, and ELD) to collect and analyze  
146 evaluation data on how undergraduates and their research mentors experienced REU programming,  
147 including their perceptions of programmatic strengths and weaknesses and recommendations for  
148 improvements. Here we report the descriptive accounts and their alignment with the evaluation results.

149 Given the unprecedented nature of the situation – specifically, the national shutdown and transition to  
150 online instruction by research institutions that host REU programming every summer – we aimed to  
151 address two research questions:

- 152 • In what ways were summer REU programs implemented remotely or online?
- 153 • What were the strengths of these programs as well as suggestions for improvement from the  
154 perspectives of undergraduate researchers?

155 Our results yield preliminary insights into the features of remote REUs that might make them effective for  
156 students and their mentors and to inform the improvements of such programs in the future.

157

## 158 **DESIGN AND METHODS**

159 We designed this study to include both observational, descriptive and evaluative components. Through  
160 the observational description, we sought to characterize the range of ways REU site programming was  
161 implemented during the COVID-19 pandemic. We used a “case series” approach which allowed for the  
162 systematic documentation of 23 life science REU programs offered in summer 2020, each serving as a  
163 distinct case or implementation of a remote REU site (Grimes & Schulz, 2002). We collected data to  
164 document who participated in the 23 remote REU programs, what activities occurred in each program,  
165 and when, where, and how each program was implemented. Then, we conducted an evaluation study of  
166 the different REU programs from a utilization-focused perspective (Patton, 2008), meaning that we aimed  
167 to collect, analyze, and report data that would be useful to REU site principal investigators (PIs).

168 Specifically, we sought feedback from undergraduate researchers and their research mentors on the  
169 strengths of the novel, remote experiences as well as suggestions for improving programs both  
170 immediately and in future offerings. The results reported here are part of a larger study of remote REUs  
171 that was reviewed and determined to be exempt by the University of Georgia Institutional Review Board  
172 (STUDY00005841, MOD00008085).

173

### 174 **Programs and Participants**

175 We invited 25 institutions that were involving students in remote or online undergraduate research  
176 programs in 2020 to participate in this study. Twenty-three (23) programs chose to participate. The  
177 programs were hosted by 24 organizations (e.g., universities, research institutes) in 18 states and 1 U.S.  
178 territory and involved 3-39 students and 2-20 mentors per site, with funding from NSF, USDA NIFA, and  
179 other sources. One site that was invited to participate in the evaluation did not have the capacity to do  
180 research at a distance, so they joined with another site to offer a combined program. Five programs across  
181 four sites also involved in-person research experiences for a small number of students, while 21 programs  
182 were entirely remote. In this study, we focus primarily on the remote programming and the experiences of  
183 students who engaged with their REU and carried out research entirely online. Table 1 provides  
184 information about the number and racial, ethnic, gender, and first-generation college status of students  
185 who participated in this study.

186

### 187 **Data Collection and Analysis**

188 We collected three types of data. We collected written program descriptions from REU Site PIs, and we  
189 conducted focus groups with REU students and their research mentors, as described below. We also  
190 collected survey data from students about the quality of their mentorship relationships and the sense of  
191 community within their programs, as there was concern that these elements of an REU may be especially  
192 difficult to achieve remotely.

193 **Written descriptions.** We collected written descriptions of each program using a structured template (see  
194 Supplemental Materials) to document when, where, and how each program was implemented from the  
195 perspective of its PI(s). Specifically, we asked PIs to describe the design and implementation of their  
196 program, including program expectations, introductory and culminating events, and weekly activities,  
197 shortly after their program was completed. We chose this timing to ensure PIs could describe the  
198 implementation of their programs in their entirety (i.e., after all activities were completed) and with  
199 accuracy (i.e., soon enough to be able to recollect program activities). We then edited the descriptions to  
200 create streamlined, self-similar “program profiles” to allow for quick comprehension and easy  
201 comparison of the features of each program. We met briefly with PIs to clarify any ambiguities and fill in  
202 any gaps in the profiles before asking for their review, any revision needed, and approval that the profile  
203 accurately represented the design and implementation of their programs. Once the profiles were  
204 completed and compiled (included in Supplemental Materials), we reviewed the collection to generate a  
205 summary description of the REU sites. Site names are included to allow readers to follow up directly with  
206 site PIs for details.

207  
208 **Focus groups.** We conducted focus groups with students in each program at the midpoint and end of their  
209 programs. An average of 81% and 67% of students participated in midpoint and end of program focus  
210 groups respectively, with percentage by program ranging from 33% to 100% for midpoint and 17% to  
211 100% for end of program. We also conducted focus groups with mentors at the midpoint and end of  
212 programs, depending on mentor availability. During all focus groups, we sought feedback about positive  
213 aspects of programs as well as suggestions for improvements. For larger programs or instances when not  
214 all students were available at the same time, we held multiple focus groups for the program and students  
215 chose the one that best suited their schedule. In instances where a student or mentor was unable to  
216 participate in a focus group, we solicited responses to the questions by email. All focus groups were  
217 recorded to ensure feedback was captured accurately and in its entirety.

218  
219 The student focus group data were the primary focus of analysis. The evaluation team (OAE, RBC, and  
220 ELD) identified strengths for each program and suggestions for improvement by reviewing student  
221 responses to the relevant focus group questions. Then the evaluation team created brief, descriptive, and  
222 actionable summaries of the strengths and suggestions for each program along with illustrative quotes as  
223 supporting data, which were provided in mid- and end-point reports to each program. The evaluation team  
224 then carried out an inductive, qualitative content analysis of the reports (Miles et al., 2014; Saldana,  
225 2015). The team independently read each strength and suggestion and ascribed it with a meaning (i.e., to  
226 what aspect of the program does this strength or suggestion relate?). The team then met as a group to  
227 discuss and refine the meanings, group them into larger themes, and develop definitions of each theme.  
228 The evaluation team then carried out a deductive check to ensure that the themes provided a coherent and  
229 cohesive representation of the meanings identified across all of the focus groups (Saldana, 2015).  
230 Specifically, the team compiled all of the feedback initially identified as fitting a particular theme and  
231 reviewed the feedback to determine whether and how it related to the theme. The team revised and refined  
232 the themes as needed to ensure they represented a parsimonious interpretation of the data while reflecting  
233 the range of feedback identified in the focus groups.

234  
235 Finally, the evaluation team reviewed all of the reports to identify cross-cutting themes related to the  
236 strengths and suggestions and to determine whether each theme was reported as a strength, a suggestion



237 for improvement, or a mixture of the two for each program. In keeping with a descriptive study, our  
238 results include detailed descriptions of each program (see Supplemental Material) as well as descriptions  
239 of the strengths and suggestions identified through this cross-program analysis. We primarily report on  
240 students' experiences because mentor feedback about strengths and suggestions mirrored feedback from  
241 the students.

242

243 **Surveys.** To complement the focus group data, we surveyed students at the end of their programs  
244 regarding:

- 245 • The extent to which they experienced their programs synchronously vs. asynchronously;
- 246 • The quality of their relationships with their research mentors (Ragins & Cotton, 1999); and
- 247 • The level of connectedness they felt in their programs (Rovai, 2002).

248 Survey items are included in the Supplemental Materials. Given the research questions and the descriptive  
249 nature of the work, survey data were analyzed using descriptive statistics. Means and standard deviations  
250 were calculated for the entire dataset as well as at the program level.

251

252 Program names have been removed in the reports of the focus group and survey data to protect program  
253 confidentiality.

254

## 255 **RESULTS**

256

257 Here we present the descriptions of remote REU site design and implementation. Then we present the  
258 themes that emerged as strengths and areas for improvement during student focus groups. We include  
259 survey results to support related focus group findings.

260

### 261 **Remote REU Site Design and Implementation**

262

263 The REU sites in this study varied in the extent to which the overall design and scientific focus changed  
264 to accommodate remote offerings. Some sites shifted to allow students to work in teams with a single  
265 mentor or to allow mentors to pair up to work with one or more students. These changes were made for a  
266 variety of reasons, outlined in the REU site profiles (see supplemental material). For some sites,  
267 restructuring for students to work in teams enabled the involvement of a larger number of students, with  
268 groups ranging from two to five students. For other sites, pairing up mentors facilitated the shift to  
269 entirely computational projects. For instance, some mentors with bench or field foci of their research  
270 paired up with colleagues doing computational work to formulate suitable projects. Some sites that  
271 typically had students work in teams dropped the teamwork component of in order to ease logistics. Some  
272 sites were already computational in focus and the *Rosetta Commons REU: A Cyberlinked Program in*  
273 *Computational Biomolecular Structure & Design* had been implemented with distributed cohorts in  
274 previous years (Alford et al., 2017). For these sites, relatively modest changes were made to  
275 accommodate entirely remote participation. Student survey responses indicated that the sites included a  
276 mix of synchronous and asynchronous programming (Figure 1).

277

278 All sites started with some form of kick-off or orientation for students and/or mentors, although the goals,  
279 structure, and content ranged widely. Some sites focused more on social interactions by facilitating get  
280 acquainted sessions and community building exercises. Some sites dedicated orientations to building

281 students' familiarity with the research, the host site, and the expectations for the summer as well as how  
282 to go about organizing their remote work. Two sites organized pre-program events or activities, such as  
283 discussions with mentors about plans for the summer and how to address issues that might arise as well as  
284 workshops to help students get acquainted with research options and begin building computational skills.  
285

286 In addition to engaging students in research, all sites implemented more didactic knowledge or skill  
287 building sessions, either early on or distributed through the summer. These sessions aimed to develop a  
288 range of skills, from coding in R to using particular types of software or platforms (e.g., ImageJ, Rosetta  
289 Commons, Software Carpentry). Other topics included how to carry out literature searches, navigate  
290 databases, use reference managers, apply for fellowships, prepare for the GRE, conduct particular  
291 statistical tests, make posters, and communicate scientifically (e.g., writing manuscript-style papers,  
292 presenting posters, etc.). All sites included sessions dedicated to the ethical and responsible conduct of  
293 research, with some sites addressing particular bioethical considerations such human subjects research  
294 and issues related to use of sex and race categories in research (e.g., the *Fungal Genomics and*  
295 *Computational Biology Summer Research* site). The *Exploring 21<sup>st</sup> Century Careers in the Biological*  
296 *Sciences: A Comparative Regenerative Biology Approach* site facilitated sessions on innovation,  
297 intellectual property, and technology transfer. The *Genes & the Environment REU from Rural & Tribal*  
298 *Colleges* site facilitated sessions on psychosocial skill building, such as managing stress, practicing  
299 mindfulness, and engaging in difficult conversations.  
300

301 All sites hosted panel discussions, scientific seminars, or talks by guest speakers to facilitate students'  
302 professional development beyond research and skill building. Panel discussions addressed a range of  
303 topics, from applying to graduate school to offering advice on careers, graduate school, and navigating  
304 science as a person of color. Most sites included students in scientific seminars or journal clubs, with  
305 some sites expecting students to present their own research in progress or on relevant literature. All sites  
306 included at least some discussion about social justice, diversity, equity, inclusion, and/or antiracism.  
307 These discussions were facilitated in a variety of ways, from hosting events on antiracism and pride to  
308 facilitating movie nights with discussions about the Black Lives Matter and ShutDownSTEM movements.  
309

310 Some sites included more informal, less structured time in their programming, such as the use of online  
311 video communication using Zoom Video Communications, Inc. (Zoom) for lunch hours, coffee breaks,  
312 teatimes, and game nights. At some sites, these events were organized by students. Some sites also  
313 included Zoom drop-in hours for advice about graduate school, careers, research, technical issues, and  
314 troubleshooting. At least two sites collected evaluation data outside of what is described here to make  
315 improvements during the summer and identify ways to support students after they completed the program.  
316 For instance, the *Bruins-in-Genomics Summer Undergraduate Research Program* site administered  
317 regular check-in surveys with students and mentors to identify and address any issues that arose.  
318

319 All sites ended with a culminating session of some sort, during which students presented their research  
320 progress in the form of short talks or posters. Two sites also held award sessions. Talk formats ranged  
321 widely from 10 to 15-minute individual or team presentations followed by a few minutes of questions and  
322 answers, to 3-minute thesis style presentations or other very short talks. All sites required students to  
323 produce one or more products, such as posters, talks, papers, proposals, or videos. The *Cary Institute of*  
324 *Ecosystem Studies REU* site required students to generate "data nuggets" (<http://datanuggets.org/>), which



325 are mini-research projects or tasks that can be used in K-16 instruction to develop students' science  
326 research skills. Some programs made a point of encouraging students to invite family and friends. The  
327 *REU Site at The Morton Arboretum: Integrative Tree Science in the Anthropocene* included keynote  
328 speakers of color. The *Rosetta Commons REU* site held their culminating event as part of a larger  
329 conference being held by the Rosetta Commons community (<https://www.rosettacommons.org/>). The  
330 *Training and Experimentation in Computational Biology* site held their closing poster session in virtual  
331 reality.

332

### 333 **Strengths and Areas for Improvement of Remote REU Sites**

334

335 Students in this study described the strengths and areas for improvement of their remote REU site in  
336 terms of 10 overarching themes (Figure 1). Three themes that emerged as strengths across sites were the  
337 (1) quality of mentorship, (2) opportunities for learning, and (3) sense of community within labs and  
338 programs. Two themes that emerged as primary areas for improvement were the (4) cohort experience  
339 and (5) unstructured nature of research and remote work. Two themes emerged as having both beneficial  
340 and problematic elements: (6) program logistics and (7) opportunities for professional socialization.  
341 Finally, three themes were identified less frequently across programs and were experienced as either  
342 strengths or areas for improvement depending on the site: (8) networking, (9) technical issues, and (10)  
343 diversity, equity, inclusion, and justice. Each of these themes is defined and described below in numerical  
344 order.

345

#### 346 **Theme 1. Mentorship: Students described the quality of support they received from their research** 347 **mentors to help them learn, make progress in their research, and be successful in their programs.**

348

349 The main strength across most of the sites in this study was the quality of the mentorship. Students in 15  
350 sites emphasized the quality of the mentorship they received, in terms of technical and career support as  
351 well as psychosocial support. One student described in detail the mentorship they received:

352 The mentor that I had personally, they went out of their way to make sure I was in a good  
353 area or ask how I was doing. My mentor in particular was [having a personal situation]. So he  
354 had to leave for a while. I had a technician of his take over and she was amazing as well.  
355 Even while his family was going through that he would message me to see, 'How are you  
356 doing? How's your research going? Is there anything that I can do?' It was going above and  
357 beyond to make sure that I was understanding what I was doing and getting the most out of  
358 this experience.

359 This quote captures a sentiment expressed by other students – that mentors provided both direct support  
360 and indirect support by connecting them with someone who could help when the mentor was unable to do  
361 so. The mostly positive experience students had with their research mentors is also evident in their overall  
362 positive ratings of the quality of their relationships with their mentors (Figure 2).

363

364 Students across sites noted how their mentors forged connections between them and the rest of the  
365 research group so they could reach out and ask questions. One student noted that “it is helpful knowing if  
366 I get stuck on something, (my mentor) is available.” Several students noted that they appreciated their  
367 mentor's ability to strike a balance between providing support and allowing students to answer their own  
368 questions. One student noted that their mentor “[made] sure [they were] on track. It wasn't too

369 overbearing, but they were also always making sure I was going along on the project.” Another student  
370 described how their faculty mentor was open to feedback such that, when the student expressed concerns  
371 about how their experience was going, “it actually improved once I talked to my PI about what was going  
372 on and what I needed from her, which helped. That made a big difference.”

373  
374 Students also noted the ways that mentors provided psychosocial support. Most students who commented  
375 on mentorship felt that their mentors cared about them not just as a scientist, but as a person. For instance,  
376 one student appreciated that their mentor “was really invested in them and invested in their research.”  
377 Another student noted that their personal relationship with their mentor is “something [they] cherish a  
378 lot.” Students also appreciated how mentors were responsive to how the pandemic could be affecting their  
379 work. One student observed “there are so many assumptions that can be made about the students,” and  
380 students appreciated mentors’ willingness to be flexible around complications that arose from working  
381 from home. Finally, students repeatedly mentioned how mentors quelled their anxieties around asking for  
382 help and that their mentor “never make [them] feel dumb for needing help.”

383  
384 Students in one site indicated that the mentorship they received was inadequate and students in three sites  
385 had mixed experiences with mentorship (see outliers in Figure 2). In these instances, students expressed  
386 concern that the time they were able to spend with mentors and the ways they were able to communicate  
387 (or not) with their mentors compromised the quality of their experience. For instance, some students who  
388 were struggling to make progress on their project felt they could not just “drop in” to ask a question or get  
389 help. They perceived that their mentors would have been receptive to providing drop-in help if the  
390 program had been in person, but they didn’t see a way to accomplish this remotely. One student indicated  
391 they had a set weekly meeting with their mentor and otherwise weren’t “allowed” to contact their mentor  
392 with questions except for emergency situations. This often meant that they would reach an impasse in  
393 their research and be unable to make progress until the next weekly meeting.

394  
395 One point was made during a mentor focus group that was not otherwise represented in the student  
396 results. These mentors explained that the remote nature of the REU program made it more difficult to  
397 oversee and manage what students were doing on an hour-by-hour or day-by-day basis however, they  
398 were pleasantly surprised by how much students could achieve without oversight. In other words, the  
399 circumstances made it such that mentors were by default more hands off, which resulted in students  
400 having more autonomy to make decisions and solve problems on their own. The mentors in this group  
401 planned to apply what they learned to their in-person mentoring relationships by giving students more  
402 freedom to make progress and decisions on their own.

403  
404 **Theme 2. Learning: Students described gains in knowledge, skills, or abilities as a result of**  
405 **participating in remote research.**

406  
407 Students in 15 sites emphasized how much they learned from their research experience. Students reported  
408 gaining knowledge in the content area of their research and vastly improving their coding skills; one  
409 student describing their coding abilities as “phenomenally improved.” Even for sites where computational  
410 biology was not a major emphasis, the remote nature of the research meant that students carried out  
411 projects that involved coding to query datasets and conduct analyses. Students perceived that their  
412 research experiences provided a “real-life” context for learning to code, which was superior to learning

413 coding through coursework, as one student noted: “be[ing] able to actually use it in a project was so much  
414 better for learning how to program than anything I could have learned in a class at my university.” In  
415 addition, students perceived that their new skills would be “so beneficial for future research and future  
416 labs.”

417  
418 Beyond gaining content knowledge and technical skills, students reported learning more about the  
419 research process and gaining confidence in their own abilities to be successful in research. One student  
420 noted that “when [they] first started,” [they] thought it would be super hard to conduct research, and it  
421 was difficult, but it’s not as unattainable as [they] once thought it was.” Beyond this, students report  
422 developing other professional and scientific skills such as troubleshooting. Several students gained a new  
423 appreciation for solving problems on their own, expressing that “figuring out things for yourself has  
424 become satisfying” and that they now felt “equipped with the skills to be able to troubleshoot problems  
425 when I have them.” Students expressed surprise that they were able to grow in their knowledge, skills,  
426 and confidence in such a short time while working remotely, one student explaining that “[at first, I was]  
427 really nervous putting things together... but toward the end I was really communicating with my  
428 colleagues.”

429  
430 **Theme 3. Sense of Community: Students described the sense of being connected to and comfortable**  
431 **with their research groups, sites, or broader scientific communities.** (Note: Students described their  
432 sense of community as distinct from being part of an undergraduate research cohort. Thus, cohort  
433 experience is described separately below.)

434  
435 Students in 12 sites emphasized how their sites and their research groups created a sense of community,  
436 which manifested in a variety of ways. For example, some students described how their sites created a  
437 culture where students felt they could “go to anyone for help” and that this environment allowed them to  
438 “see how collaborative research really is.” Some sites and research groups ensured that students had  
439 ample opportunities to interact with graduate students other than those who served as their research  
440 mentors, and that this had a “profound impact on [their] overall experience” and “play[ed] a big role in  
441 feeling welcome to [their] lab group.” Students emphasized the importance of making these connections  
442 early in the summer so that it was easier to seek out that guidance later in the program. Yet another  
443 student noted that the level of engagement by everyone involved in the program helped them feel like part  
444 of a community. The student described that, during presentations, “everyone is really supportive and  
445 engaged and they give you really valuable feedback, not just for the sake of giving feedback, but because  
446 they're actually engaged with what you're saying.”

447  
448 The sense of community students developed is also evident in their overall positive ratings of their  
449 connectedness with their sites (Figure 3), although students were less favorable about this than about their  
450 relationships with their research mentors. Students in one site expressed frustration that there wasn’t  
451 transparency about whether they could seek help from others outside their research group or what  
452 resources were available to provide help. They explained that there was a “resource sitting there for  
453 everybody and only a select few knew about it.” In this instance, it appeared that one or a few research  
454 groups made their students aware of the resource but that other research groups and the site administrators  
455 did not, which created inequity that undermined the sense of community in the program. Similarly, in this  
456 program, certain research groups made an effort to connect their students with other faculty. These

457 students appreciated the opportunity to develop relationships with faculty members other than their  
458 mentors and to become part of a “community of different scientists.” Students who did not have this  
459 experience were eager for it, indicating they wanted to learn from a broader and more diverse group of  
460 faculty members about topics beyond “research and what they look for in graduate students,” such as  
461 “how they became a scientist and what they see as lab culture.”

462

463 **Theme 4. Cohort experience: Students described the sense of being banded together as a group of**  
464 **research interns, feeling close to and engaged with other undergraduate researchers in their cohort**  
465 **or feeling isolated or disconnected from the group.**

466

467 Students in 12 sites indicated that they missed feeling like a cohort and expressed concern about missing  
468 out on a cohort experience. In one of these sites, students reported mixed perceptions of cohort feelings,  
469 with some finding it easier and some finding it more difficult to get to know one another. One student  
470 expressed this mixed feeling in describing their end-of-program poster session, noting that “it was sweet  
471 to see the other interns and to like want to go to their [Zoom breakout] rooms and just check in on  
472 everyone. I still feel like, even though [the program] wasn't in-person, it built camaraderie and a cohort.”  
473 Across the 12 sites, students reported several factors that prevented or undermined the development of a  
474 cohort feeling. First, some sites involved only a few students. Students thought that the small number was  
475 insufficient to provide a cohort experience. Second, at least one site held fewer whole group events as the  
476 summer progressed to allow students to focus their attention on their research. Students in this site  
477 indicated that they would have preferred to continue meeting weekly as a whole group to continue to get  
478 to know each other. Finally, students found it difficult to have more casual interactions that normally  
479 occurred when working alongside others. They felt that this limited their abilities to network and build  
480 relationships with other students. One student explained that their site “tried to do little things to build  
481 community for the students who were remote learning, but it as far as I can tell, it kind of fell short, I was  
482 really only communicating with the people in my [research] team.”

483

484 Other students lamented the loss of informal interactions because they were not “able to ask a neighbor  
485 ‘hey, can you help me out with this?’” One student explained how not getting to know people on a  
486 personal level meant that they were not able to alleviate some of the nervous feelings associated with  
487 asking questions. Students had mixed feelings about social hours on Zoom for cohort building. Some  
488 appreciated having game nights or other social activities (e.g., Pictionary on virtual whiteboards, bingo,  
489 escape room, trivia night, Jackbox, virtual meditation or yoga), while others felt “Zoom fatigue” after  
490 many hours of program and research activities on Zoom. Students in several sites suggested integrating  
491 cohort building into regular workweek activities rather than as an additional activity. For instance,  
492 students in several sites expressed the desire for synchronous, online work time on Zoom to simulate an  
493 in-person collaborative work environment. Students could join the call and ask impromptu questions or  
494 talk through ideas as they worked. Similarly, students wanted to use GroupMe or Slack among  
495 themselves to communicate about non-research related things and get to know each other.

496

497 Students in three sites indicated that their sites supported a sense of being part of a cohort of  
498 undergraduate researchers. These students emphasized that they still felt a sense of connection with other  
499 undergraduate researchers in their site despite the remote circumstances. They appreciated the opportunity  
500 to interact with other undergraduates and they reported that doing activities as a group and being

501 encouraged by site leadership to socialize among themselves helped to achieve this. Other factors that  
502 promoted their sense of camaraderie in their cohorts included talking about things “outside the scope of  
503 our respective projects,” such as students’ roles in the broader scientific community and in the world  
504 given the country’s raised awareness of systemic racism and racial injustice. For instance, one group of  
505 students commended their site for making time and creating a safe space for discussion about  
506 BlackLivesMatter and ongoing racial injustice in honor of the #ShutdownSTEM initiative. This group  
507 reported that these activities have helped to both “build a dialogue about the issues and build a  
508 community” among the cohort. Students in another site appreciated the intentionality displayed by their  
509 site’s leadership to facilitate a sense of community. This site established a committee structure, which  
510 gave every student a way to be involved and promoted a sense of inclusion. Several students indicated  
511 that having a social committee helped to enhance the cohort experience. Students also noted that having a  
512 student-only GroupMe group or Slack channel as well as the use of smaller breakout groups on Zoom all  
513 facilitated getting to know one another and promoted a cohort feeling.

514

515 **Theme 5. Structure: Students described program design elements, such as schedules, workflows,**  
516 **expectations, milestones, or deadlines, which helped them organize work and manage time.**

517

518 Students in 14 sites indicated that they were struggling with the lack of structure inherent to remote work  
519 and to research. They noted that having scheduling flexibility was helpful because their circumstances  
520 were so unpredictable, but that the extent of the flexibility was “daunting” and made time management  
521 difficult. They expressed concern that they didn’t know how much progress they were expected to make  
522 each day, and they struggled to define when their workday should start and end. The lack of clarity  
523 regarding how much to work and what was expected of them left some feeling like they had “to work on  
524 their project at all times” and prompted some to work longer hours. For others, they felt as though they  
525 had extra time that could have been used more productively. If they had been onsite, they would have  
526 sought additional things to do, but they weren’t sure how to do this at a distance. Having mentors with  
527 more of a “hands-off” approach exacerbated these issues.

528

529 Students across sites made several suggestions for adding structure that would have allowed them to  
530 better gauge whether they were on track in their research and programs, including:

- 531 - Defining a daily or weekly schedule or offering suggested schedules, including expected number of  
532 hours per day (even “clocking in”) and whether and how much they should take breaks to prevent  
533 burnout,
- 534 - Defining “checkpoints,” “check-ins,” “assignments,” or “intermediate goals” throughout the  
535 program to help with gauging progress and avoid tasks “hitting [them] all at once” at the end,
- 536 - Ensuring mentors set aside time every day or two or schedule standing meetings to provide  
537 guidance and instruction,
- 538 - Requiring students to write brief weekly updates or reports for their mentors to check to ensure they  
539 are making sufficient progress,
- 540 - Scheduling midpoint progress meetings to get feedback from mentors about the progress they have  
541 made, the quality of the work they have completed, and goals and potential improvements for the  
542 remainder of the summer,



- 543 - Providing a list of optional tasks or recommendations for what students could be doing if they had  
544 extra time, such as additional reading, writing, or analysis tasks, working on other projects when  
545 they have downtime on their main project, and additional skill building, and  
546 - Hosting one or two sessions with mentors or site leadership to share how they manage their  
547 workdays and brainstorm strategies for time management (e.g., what to do, in what order, and when  
548 to get things done by) and structure that helps them to “organize their day, set priorities, and meet  
549 goals.”

550

551 Some of the students who made these suggestions thought that increased structure would not only help  
552 them better gauge their progress, but would also help them avoid distractions and “set firmer boundaries  
553 with family members during times they have set aside for working.” Some students shifted to creating  
554 their own structure to mitigate the lack of structure inherent to working from home, including “making a  
555 daily checklist...that motivated me to get things done in the day” and “mak[ing] a [physical] workplace  
556 that’s separate from where you rest, just so you can separate working life better.”

557

558 Students in four sites indicated that their sites provided important structure to help them stay on track  
559 throughout the summer. One site required students to prepare a research proposal and complete other  
560 mandatory assignments, which helped them “refocus” and “make sure (they) knew what (they) were  
561 talking about.” They explained that “the more mandatory assignments [they] had, the more on track [they  
562 were] because they had to force [themselves] to reevaluate [their] understanding and application [of their  
563 knowledge and skills].” Other sites had regular meetings with site leadership, such as start-of-week  
564 check-ins, that ensured they set goals and gauged progress on a regular basis and got feedback and help  
565 before too much time had passed if they were off track.

566

567 **Theme 6. Site logistics: Students described operational aspects of sites, including onboarding,**  
568 **meetings, communication, and pacing, which improved or undermine their experience.**

569

570 Students in 15 sites indicated that several aspects of how their sites operated made it possible to navigate  
571 the program smoothly at a distance. These aspects included frequent meetings with their mentors, their  
572 cohort, and/or the site leadership, clear and open communication between students, mentors, and site  
573 leadership, and proper program pacing. Students reported that the inclusion of frequent meetings, such as  
574 daily with their mentors and weekly meetings in their sites, helped them to stay focused and motivated  
575 and to feel connected with others in the community despite being physically distant from them. They also  
576 noted that these meetings made communication easy to maintain and were important for their success in  
577 the site, helping them “feel a little bit more connected and less on my own.” Students also noted that  
578 regular communication in advance, such as weekly announcements of upcoming events and other key  
579 information, made it easier to ensure they were in the right places at the right times and had sufficient  
580 time to plan their research around site activities. Students appreciated having access to this information in  
581 a single location or platform so they could find it when they needed it. Students in several sites  
582 commented that their sites started more slowly, helping them acclimate to working online at a distance  
583 and get up to speed on their research. They also appreciated that pacing changed over time, allowing more  
584 time as the summer progressed to focus more on research and less on site activities.

585



586 Students in 17 sites commented that some logistical elements were missing, which compromised their  
587 overall experience. Examples included poor or sporadic communication, uneven program pacing, and  
588 difficulties with onboarding. Regarding communication, students reported wanting more open and  
589 consistent communication among them, their mentors, and site leadership. For instance, some students  
590 reported getting announcements on multiple platforms, which led to confusion about where and when to  
591 find needed information. In some instances, announcements came with such short notice that students  
592 missed activities. Other students expressed concern that their mentors seemed unaware of site activities,  
593 which resulted in site activities feeling separated from or in conflict with their research activities. In these  
594 instances, students felt like they had to choose between their site responsibilities and furthering their  
595 research. Students suggested that summer program calendars be shared with mentors in order to alleviate  
596 confusion. They also suggested scheduling events at a particular time and communicating these times  
597 with mentors and students sufficiently far in advance to allow for planning. Students indicated that  
598 mentors needed to seek mentee input when scheduling meetings since everyone had different schedules,  
599 often in different time zones.

600  
601 Students in multiple sites struggled with the pacing of their program. They expressed concerns about  
602 pacing both within a day and across the summer. Day-to-day, students emphasized the importance of  
603 limiting the number of online meetings and sticking to schedules rather than letting meetings run over  
604 time. Across the summer, students indicated that site activities should be more evenly spread throughout  
605 the summer, rather than front-loaded at the beginning. This change would allow for more time to start  
606 research and enable just-in-time guidance and support, such as writing workshops when students would  
607 be writing instead of early in the summer. Finally, given the remote nature of the sites, students needed  
608 functional computers, software, and network access as well as institutional credentials to access  
609 institutional resources and functions.

610  
611 **Theme 7. Professional socialization: Students described how sites helped them gain insight into**  
612 **graduate education and research careers and to envision themselves pursuing further education**  
613 **and careers in science.**

614  
615 Students in 15 sites indicated that their sites facilitated their professional socialization despite the remote  
616 circumstances. One approach that sites used to accomplish this was to host online sessions related to  
617 graduate education, including webinars about fellowships and funding opportunities, panels with current  
618 graduate students, and workshops for GRE preparation<sup>1</sup>. Students found it inspiring to hear from current  
619 doctoral students and the many different paths they could take to graduate school. One student highlighted  
620 how an NSF grant workshop was so “motivating” that it “inspired [them] to get [their] academics in order  
621 [so that they could] get research opportunities in the future, and eventually get to graduate school.”  
622 Several students noted that these sessions served as a “mental health break” from the challenging work  
623 they were doing in their research.

624

---

<sup>1</sup> Although this was not a focus of any of the discussions, it is important to note that the GRE is increasingly being dropped as a requirement for graduate applications in the life sciences and is not allowed to be reported by some programs. These decisions are driven by the growing number of studies showing the lack of predictive validity of the GREs for success in life science doctoral programs (e.g., Hall et al., 2017; Moneta-Koehler et al., 2017; see <https://beyondthegre.org/grexit/> for a comprehensive list).

625 In addition to engaging students in research, sites supported students' professional socialization by  
626 hosting sessions highlighting the diversity of research careers. Typically, these sessions involved panels  
627 of scientists from a wide range of fields, careers, and backgrounds, providing students insights into "what  
628 it's really like to be a researcher, the good and the bad," and helping them to discern whether they would  
629 like to pursue a career in research. Students noted that a major advantage of online panels was that they  
630 met scientists from a wide variety of fields from all over the country, which they thought might not have  
631 happened if the site was in-person. Some students felt their sites could have done more to integrate them  
632 into the research community. Typically, these sites did not offer workshops related to graduate school  
633 preparation or had limited if any interactions with speakers, panelists, and other students.

634  
635 Through attending workshops about graduate school, hearing from current doctoral students and scientists  
636 during panels, and doing research, students reported feeling that they had "found their purpose." For  
637 instance, one student indicated that "I live close to [a Native American] reservation, and I'm a [member of  
638 this tribe], too. It was hard to not be able to do anything for my people [during the pandemic]... I didn't  
639 know how to help out. When I heard about this research experience, it was like, 'Hey, this is how I can  
640 actually help in some way.'" More generally, students also commented developing "confidence in  
641 [themselves]... and what kind of research [they] want to do" and "reassurance that [they] can do this and  
642 that this is something that [they] can see [themselves] pursuing."

643  
644 **Theme 8. Networking: Students described opportunities to meet and build relationships with others**  
645 **who may be helpful for learning and career development.**

646  
647 Students in six sites explained how their sites provided opportunities to meet and build relationships with  
648 faculty, professionals, graduate students, and peers who could help them learn or otherwise advance  
649 toward achieving their education or career goals. Several students felt that they had plenty of  
650 opportunities to "expand their network." For some, networking mitigated the feeling of being isolated,  
651 explaining, "if we didn't get to meet as many people from [the institution] as we did, the [remote]  
652 experience would have been significantly more isolating." In fact, some students commented that "the  
653 most impactful" thing they got out of their research experience were the connections they made  
654 throughout the summer, as one student describes, "The community was something that was really helpful  
655 for me, especially looking at the network of resources and the networks of labs to join for possible next  
656 steps in my future as well as the future of my research." Several students expressed how grateful they  
657 were to finish their program feeling like they had met people who could help them as they progress in  
658 their careers. One student commented that, before their experience, they didn't realize how collaborative  
659 the scientific community was and thought that it was "really awesome to see that, from this one  
660 opportunity, [they] now have connections to [so many] different places."

661  
662 Even in programs where students noted networking was a strength, this varied by lab group, with some  
663 groups fostering more connections than others. For example, several students commented that they heard  
664 from their peers about interacting with graduate students and they wished they had more opportunities to  
665 do so. Students also expressed a desire to develop relationships with faculty other than their own mentor.  
666 They felt they had learned so much from their own mentor, that their experience could only be enhanced  
667 by learning from other mentors. Some specifically wanted to hear from faculty members about topics  
668 "beyond research," such as "how they became a scientist and [how they view] lab culture," and these

669 students mentioned that having meet-and-greet hours with faculty would be an impactful way to facilitate  
670 these connections. Other students suggested having their work reviewed by more than one mentor would  
671 afford opportunities to get more feedback and build rapport with other mentors. Students acknowledged  
672 that they felt personal “responsibility to network and make those connections” as well as a responsibility  
673 of the site to facilitate building relationships, especially given how challenging this was for students to do  
674 remotely.

675  
676 Students indicated that sites supported networking in multiple ways. Some sites encouraged students to  
677 talk and work with lab groups and mentors other than their own. Other sites took advantage of the remote  
678 circumstances to organize cross-site activities and events. Students who participated in these opportunities  
679 appreciated connecting to researchers both within and beyond their site and were grateful that this enabled  
680 them to be able to work with mentors with expertise in their research interests. Students in some programs  
681 had the opportunity to help choose speakers and organize seminars. One student explained that this was  
682 an advantage of a remote site because they had “a wider range of speakers because we can reach people  
683 all over the world right now,” and how “hearing from a researcher in [another country] was especially  
684 exciting.” Having informal settings for interaction was another tactic that supported networking. For  
685 instance, one site had weekly check-ins with the directors, which one student indicated was a favorite part  
686 of their program.

687  
688 **Theme 9. Technological Issues: Students described issues with technology that undermined or**  
689 **limited their experience.**

690  
691 Students in five sites reported several issues with technology that compromised their research progress  
692 and their overall experience. First, some students had difficulty accessing communication platforms (e.g.,  
693 an institutional learning management system) either because they did not have the appropriate credentials  
694 for access or because the platform itself was “confusing to navigate” or “hard to use.” Second, some  
695 students described how their sites used multiple communication platforms, which made “easy to miss  
696 things” when certain events or activities were announced in one platform, but other key information was  
697 available in a different platform. Third, some students did not have sufficient internet connections or  
698 access to a computer with sufficient computing capacity or credentialing to allow for access to necessary  
699 software. These issues were identified by sites and PIs were responsive to student needs, yet the time it  
700 took for technology issues to be solved ultimately limited the amount of progress students felt they could  
701 make in their research. Finally, some students indicated that they did not have enough support with  
702 coding or learning to code. Several of these students explained that, by the second half of their programs,  
703 they had found someone that they could ask for coding help when needed. Yet, they wished these  
704 connections had been made available to everyone in the program early in the summer so that they had  
705 equal access to support and could have made better progress throughout the summer.

706  
707 Interestingly, no students indicated technology as an area of strength for their site, possibly because  
708 students expected technology to work and thus only noticed when their expectations were not met.  
709 Students who reported having technology issues made three suggestions for preventing these issues or  
710 mitigating their impacts in the future. First, they recommended selecting a common, easy-to-use platform  
711 for communication such as group messaging (e.g., GroupMe, Slack) or email lists. Second, they  
712 recommended setting up institutional credentials and conducting technology audits in advance of the site

713 start date by determining the technological needs of each research project and the computing and internet  
714 capacity to which each student has access. If the needs exceed the capacity, there should be sufficient  
715 time to ship suitable computers (this was done by the *Summer Integrative Neuroscience Experience in*  
716 *Jupiter* at Florida Atlantic University), set up improved internet access, and ensure students have needed  
717 credentials in place. Finally, they recommended making transparent to all students the individuals who  
718 could provide coding support. This support could be provided by the research group, the site, and/or the  
719 institution, depending on needs and resources.

720

721 **Theme 10. Diversity, equity, inclusion, justice, and representation: Students described how sites**  
722 **created time and space to discuss social justice topics.**

723

724 A review of the REU site profiles (see Supplemental Materials) shows that all sites facilitated at least one  
725 formal or informal discussion or event regarding diversity, inclusivity, social justice, or anti-racism.  
726 However, students in only three sites mentioned this aspect as a strength of their site. One possible  
727 explanation for this is that many of these events and discussions were informal in nature or limited in  
728 scope so students might have not perceived these discussions as a formal part of the site or sufficiently  
729 substantive to be mentioned during the focus groups.

730

731 Students in two sites spoke about how their sites set time in their schedules to discuss issues around  
732 diversity, equity, inclusion, and social justice, as well as representation of individuals from backgrounds  
733 that are traditionally excluded or marginalized from the sciences. Students in these sites noted that the  
734 discussion of the larger national social justice conversation made them feel as though they were “people  
735 and not just scientists.” These students also appreciated the opportunity to bring their whole selves to their  
736 research experience and they appreciated being encouraged to “talk how they like to talk.” One student  
737 explained that offering remote REU experiences allowed for participation in research by people with  
738 disabilities or other circumstances that prevented traveling to a distant site. One student indicated that  
739 they had not previously imagined applying to graduate school but found it “inspiring” to hear from  
740 graduate students who took non-traditional paths to graduate school.

741

742 In one site that held multiple events related to diversity and inclusion in STEM, students explicitly  
743 highlighted representation and DEIJ as an area of weakness due to the absence of people of color in  
744 workshops and seminars. Additionally, they mentioned that they would have appreciated receiving advice  
745 from individuals from more economically diverse backgrounds and diverse career paths “other than ‘went  
746 to undergrad, went to grad school, got a job, paid off my loans.’”

747

748 **DISCUSSION**

749

750 When considered collectively, these results indicate that remotely implemented REU sites can, at least  
751 under certain circumstances, afford many of the same opportunities that in-person sites offer. Students  
752 indicated that they learned, experienced quality mentorship, grew professionally, and expanded their  
753 networks. They felt like they became a part of a research community that would not have been available  
754 to them if they had not participated in remote research. This finding adds to a previous report that students  
755 in a mostly remote REU site were able to develop a sense of community (Alford et al., 2017). In addition,  
756 the remote implementation of research experiences appeared to provide access to networks that might not

757 have otherwise been available. Specifically, the remote implementation prompted sites to invite  
758 individuals from all around the country and even around the world to meet with students as speakers,  
759 panelists, and collaborators, thereby expanding students' connections far beyond what might have  
760 occurred in-person. These results should provide some reassurance that remote REUs are worth offering  
761 and may offer some advantages over or in addition to in-person programming. For example, remote sites  
762 could involve undergraduates in research whose personal situations would preclude participating in an  
763 onsite program. In-person sites could consider adopting some of the strategies used during remote  
764 programming, such as networking across sites and holding sessions using video conferencing so that  
765 students can interact with speakers, panelists, and collaborators beyond those who are available onsite.

766  
767 Our results also indicate that several elements of REUs were more challenging to implement at a distance.  
768 For instance, even though most students reported experiencing quality mentorship, others indicated that  
769 their mentorship experiences fell short of meeting their needs. In these instances, students perceived that  
770 the absence of quality mentorship stymied their research progress and professional growth. It may be that  
771 the quality of mentorship simply varies within sites, which is consistent with research on mentorship in  
772 undergraduate research (Byars-Winston & Dahlberg, 2019; Hernandez et al., 2017, 2020; Limeri et al.,  
773 2019). Alternatively, some mentors may be less prepared to provide support at a distance and may need  
774 additional guidance and support on how to do so effectively. There is little if any research on how to  
775 prepare mentors to remotely support undergraduate researchers, which presents the unique challenge of  
776 not being able to “drop in” to see how an undergraduate researcher is doing or otherwise engage in  
777 informal interactions that are critical components of effective mentorship (Ragins & Cotton, 1999).  
778 However, sites can put several measures in place to avoid or mitigate the impact of insufficient or  
779 problematic mentorship, which are consistent with recommendations from the National Academies on  
780 effective and inclusive research mentorship (Byars-Winston & Dahlberg, 2019). First, sites can set clear  
781 expectations for the frequency with which mentors should be expected to communicate with students and  
782 the flexibility of that communication. Second, sites can collect data on mentorship support and quality  
783 and determine whether certain individuals are not well suited to mentor students at a distance or in  
784 general. Finally, sites can conduct midpoint checks with students about the mentorship they are receiving,  
785 including what is working well and what needs to be improved. This feedback can then be used to help  
786 mentors and students improve their mentoring relationship or remove students from situations that are  
787 deemed sufficiently problematic.

788  
789 Although students reported developing a sense of community with their research groups, they expressed  
790 concern about missing out on being part of a cohort. This concern was mitigated somewhat by sites that  
791 promoted informal interactions and at least one site that made use of a committee structure through which  
792 social activities were promoted and each student had a specific responsibility as part of the site. This is  
793 consistent with research on community building, which indicates that community can be fostered through  
794 shared tasks (Kim, 2006; Lave & Wenger, 1991; Wenger, 1999). Students in remote sites shared research  
795 tasks and thus built community with their research groups. For the most part, however, they did not have  
796 shared programmatic tasks. Although it is not clear that in-person REUs have shared programmatic tasks,  
797 it may be that ad hoc, informal interactions that occur in in-person sites promote identification with the  
798 group and shared responsibility for its growth and success. The site that made use of a committee  
799 structure was able to promote cohort building even at a distance. Other sites could consider establishing  
800 roles or responsibilities for students to help foster their site-level engagement and cohort building.



801  
802 The example of the committee structure and the problems that students attributed to lack of structure  
803 highlight the overarching importance of structure. Indeed, a growing body of research indicates how  
804 structure in the form of policies and procedures helps to ensure equitable engagement and success of all  
805 students regardless of their backgrounds or prior preparation (Balster et al., 2010; Eddy & Hogan, 2014;  
806 Hurtado et al., 2008; Tanner, 2013). Science research itself is an unstructured or “ill-structured” endeavor,  
807 meaning that there are multiple ways to make progress and no single “right” answer (Dolan & Weaver,  
808 2021; Simon, 1977). In addition, at least some of the students in this study struggled to organize their  
809 workdays because they did not have the structure of physically leaving home at a regular time to go to a  
810 research environment. Thus, remote research appeared to function as a “double whammy” – requiring  
811 students to navigate an ill-structured task in an unstructured environment. Students in sites that included  
812 more structure noted how this was a strength. In particular, students sought clear, consistent, and widely  
813 communicated schedules, expectations, and milestones as well as information about resources, such as  
814 who can provide help when issues or challenges arose. Students also wanted one-on-one meetings daily or  
815 every other day with mentors and meetings with their entire cohort and site leadership at least weekly.  
816 While some flexibility is needed and was expected, our results provide evidence that leaving structures  
817 entirely to individual research groups (e.g., whether and how frequently mentors meet with students) was  
818 problematic for students. Conducting an audit to identify technology needs in advance of the site start  
819 date is another example of a structure that would help to mitigate issues with diverse technology needs  
820 that students perceived as undermining their research progress and professional growth.

821  
822 One of the most striking results in our view was how few students mentioned that they discussed issues  
823 related to diversity, equity, inclusion, or justice (DEIJ) during their programs. This result is especially  
824 noteworthy for multiple reasons. First, the NSF REU program prioritizes engagement of persons excluded  
825 because of ethnicity or race (Asai, 2020). Second, the sites took place just months after the killings of  
826 Ahmed Arbery, Breonna Taylor, and George Floyd and at the height of national consciousness about  
827 BlackLivesMatter, and all sites included one or more activities or events related to DEIJ. Furthermore, the  
828 #ShutDownAcademia / #ShutDownSTEM strike occurred on June 10, when all of the sites in this study  
829 were in session. It is possible that these discussions occurred and were simply not reported during focus  
830 groups. It is also possible that DEIJ activities or events were too limited in scope or disconnected from  
831 other aspects of site programming to be perceived as a strength. For instance, the one site where DEIJ was  
832 reported as needing improvement held multiple DEIJ events, but students perceived that people from  
833 excluded backgrounds were missing from non-DEIJ workshops or seminars. This finding brings to  
834 attention, once again, the need to restructure higher education such that DEIJ is an integral element rather  
835 than an additional activity.

836  
837 Fortunately, there is a growing body of research on how to engage in difficult dialogues that can be used  
838 to ensure that REU sites dedicate time and create safe spaces for discussion of the value of diversity, ways  
839 to ensure equity and promote inclusion, and the importance of justice (Asai, 2020; Asai & Bauerle, 2016;  
840 Page, 2008; Sue et al., 2009; Tienda, 2013). At least some of this research has been described and  
841 translated into practical actions that could be applied to REU sites (Braun et al., 2018; Gin et al., 2020;  
842 Harrison & Tanner, 2018; Pfeifer et al., 2020; Seidel et al., 2015; Tanner & Allen, 2007; Tanner, 2013).  
843 Students at sites that created space and time for these discussions called them out as important  
844 conversations that helped them see their role in the world of science research. Future programming should



845 ensure that time and space is dedicated to engaging in these important discussions and that the voices and  
846 experiences of people of color are integrated throughout programming, tapping local experts in diversity  
847 offices and centers for teaching and learning for guidance.

848  
849 It is important to note that the study reported here is descriptive and evaluative in nature rather than a  
850 comparison of outcomes of remote versus in-person REU sites or a causal test of whether certain  
851 variables influence the effectiveness or inclusiveness of remote REUs. We have strived to keep our  
852 reporting of the results descriptive and, when possible, to highlight other research that is useful for  
853 understanding the observations and for improving remote REU sites in the future. Table 2 provides a list  
854 of the specific recommendations that students offered for maximizing the quality of their experience in  
855 remote REUs.

856  
857 Our results raise several questions that should be addressed in future research. For example, what  
858 professional development and support structures are needed to ensure the quality and effectiveness of  
859 remote mentorship relationships? To what extent do remote REU sites allow engagement of  
860 undergraduates in research who would otherwise not have such opportunities? Do students in remote  
861 REU sites pursue graduate education and research related careers at the same level as students who  
862 complete in-person programs? Could REU sites that involve some students in person and others at a  
863 distance without creating inequitable experiences among members of the cohort or their mentors?  
864 Although these questions should be pursued with caution to avoid disadvantaging those who participate in  
865 research remotely, our results provide evidence that remote REUs are sufficiently positive to allow for  
866 further investigation of their affordances and constraints.

## 867 868 **ACKNOWLEDGEMENTS**

869 We thank all of the students, faculty, and other research mentors for their willingness to proceed with  
870 remote REU programming and for sharing their experiences so that others could learn. We also thank  
871 Riley Hess for her feedback on drafts of this manuscript. This material is based upon work supported by  
872 National Science Foundation under Grant No. DBI-2030530. Any opinions, findings, conclusions, or  
873 recommendations expressed in this material are those of the authors and do not necessarily reflect the  
874 views of any of the funding organizations. The authors dedicate this work to all of the undergraduates  
875 seeking to do research and the individuals who provide these opportunities despite challenging  
876 circumstances.

877  
878

879 **REFERENCES**

880

- 881 Alford, R. F., Leaver-Fay, A., Gonzales, L., Dolan, E. L., & Gray, J. J. (2017). A cyber-linked  
882 undergraduate research experience in computational biomolecular structure prediction and design.  
883 *PLoS Computational Biology*, *13*(12), e1005837. <https://doi.org/10.1371/journal.pcbi.1005837>
- 884 Asai, D. J. (2020). Race matters. *Cell*, *181*(4), 754–757.
- 885 Asai, D. J., & Bauerle, C. (2016). From HHMI: Doubling Down on Diversity. *CBE-Life Sciences*  
886 *Education*, *15*(3), fe6. <https://doi.org/10.1187/cbe.16-01-0018>
- 887 Balster, N., Pfund, C., Rediske, R., & Branchaw, J. (2010). Entering Research: A Course That Creates  
888 Community and Structure for Beginning Undergraduate Researchers in the STEM Disciplines.  
889 *CBE-Life Sciences Education*, *9*(2), 108–118. <https://doi.org/10.1187/cbe.09-10-0073>
- 890 Braun, D. C., Clark, M. D., Marchut, A. E., Solomon, C. M., Majocho, M., Davenport, Z., Kushalnagar,  
891 R. S., Listman, J., Hauser, P. C., & Gormally, C. (2018). Welcoming Deaf Students into STEM:  
892 Recommendations for University Science Education. *CBE—Life Sciences Education*, *17*(3), es10.  
893 <https://doi.org/10.1187/cbe.17-05-0081>
- 894 Byars-Winston, A., & Dahlberg, M. (Eds.). (2019). *The Science of Effective Mentorship in STEMM*.  
895 National Academies Press. <https://doi.org/10.17226/25568>
- 896 Clark, I. E., Romero-Calderón, R., Olson, J. M., Jaworski, L., Lopatto, D., & Banerjee, U. (2009).  
897 “Deconstructing” Scientific Research: A Practical and Scalable Pedagogical Tool to Provide  
898 Evidence-Based Science Instruction. *PLoS Biology*, *7*(12).  
899 <https://doi.org/10.1371/journal.pbio.1000264>
- 900 Collison, G., Elbaum, B., Haavind, S., & Tinker, R. (2000). *Facilitating Online Learning: Effective*  
901 *Strategies for Moderators*. Atwood Publishing, 2710 Atwood Ave.
- 902 Dolan, E., & Weaver, G. (2021). *A Guide to Course-based Undergraduate Research: Developing and*  
903 *Implementing CUREs in the Natural Sciences*. W. H. Freeman.
- 904 Eddy, S. L., & Hogan, K. A. (2014). Getting Under the Hood: How and for Whom Does Increasing  
905 Course Structure Work? *CBE-Life Sciences Education*, *13*(3), 453–468.  
906 <https://doi.org/10.1187/cbe.14-03-0050>
- 907 Estrada, M., Woodcock, A., Hernandez, P. R., & Schultz, W. P. (2011). Toward a model of social  
908 influence that explains minority student integration into the scientific community. *Journal of*  
909 *Educational Psychology*, *103*(1), 206–222. <https://doi.org/10.1037/a0020743>
- 910 Gentile, J., Brenner, K., & Stephens, A. (Eds.). (2017). *Undergraduate Research Experiences for STEM*  
911 *Students: Successes, Challenges, and Opportunities*. National Academies Press.  
912 [https://www.nap.edu/catalog/24622/undergraduate-research-experiences-for-stem-students-](https://www.nap.edu/catalog/24622/undergraduate-research-experiences-for-stem-students-successes-challenges-and-opportunities)  
913 [successes-challenges-and-opportunities](https://www.nap.edu/catalog/24622/undergraduate-research-experiences-for-stem-students-successes-challenges-and-opportunities)
- 914 Gin, L. E., Guerrero, F. A., Cooper, K. M., & Brownell, S. E. (2020). Is Active Learning Accessible?  
915 Exploring the Process of Providing Accommodations to Students with Disabilities. *CBE—Life*  
916 *Sciences Education*, *19*(4), es12. <https://doi.org/10.1187/cbe.20-03-0049>
- 917 Grimes, D. A., & Schulz, K. F. (2002). Descriptive studies: What they can and cannot do. *The Lancet*,  
918 *359*(9301), 145–149.
- 919 Hall, J. D., O’Connell, A. B., & Cook, J. G. (2017). Predictors of Student Productivity in Biomedical  
920 Graduate School Applications. *PLOS ONE*, *12*(1), e0169121.  
921 <https://doi.org/10.1371/journal.pone.0169121>
- 922 Harrison, C., & Tanner, K. D. (2018). Language Matters: Considering Microaggressions in Science.  
923 *CBE—Life Sciences Education*, *17*(1), fe4. <https://doi.org/10.1187/cbe.18-01-0011>

- 924 Hernandez, P. R., Agocha, V. B., Carney, L. M., Estrada, M., Lee, S. Y., Loomis, D., Williams, M., &  
925 Park, C. L. (2020). Testing models of reciprocal relations between social influence and  
926 integration in STEM across the college years. *PLOS ONE*, *15*(9), e0238250.  
927 <https://doi.org/10.1371/journal.pone.0238250>
- 928 Hernandez, P. R., Bloodhart, B., Barnes, R. T., Adams, A. S., Clinton, S. M., Pollack, I., Godfrey, E.,  
929 Burt, M., & Fischer, E. V. (2017). Promoting professional identity, motivation, and persistence:  
930 Benefits of an informal mentoring program for female undergraduate students. *PLOS ONE*,  
931 *12*(11), e0187531. <https://doi.org/10.1371/journal.pone.0187531>
- 932 Hurtado, S., Cabrera, N. L., Lin, M. H., Arellano, L., & Espinosa, L. L. (2008). Diversifying Science:  
933 Underrepresented Student Experiences in Structured Research Programs. *Research in Higher*  
934 *Education*, *50*(2), 189–214. <https://doi.org/10.1007/s11162-008-9114-7>
- 935 Kim, A. J. (2006). *Community building on the web: Secret strategies for successful online communities*.  
936 Peachpit press.
- 937 Laursen, S., Hunter, A.-B., Seymour, E., Thiry, H., & Melton, G. (2010). *Undergraduate Research in the*  
938 *Sciences: Engaging Students in Real Science*. John Wiley & Sons.
- 939 Lave, J., & Wenger, E. (1991). *Situated Learning: Legitimate Peripheral Participation*. Cambridge  
940 University Press.
- 941 Limeri, L. B., Asif, M. Z., Bridges, B. H. T., Esparza, D., Tuma, T. T., Sanders, D., Morrison, A. J., Rao,  
942 P., Harsh, J. A., Maltese, A. V., & Dolan, E. L. (2019). “Where’s My Mentor?!” Characterizing  
943 Negative Mentoring Experiences in Undergraduate Life Science Research. *CBE—Life Sciences*  
944 *Education*, *18*(4), ar61. <https://doi.org/10.1187/cbe.19-02-0036>
- 945 Loeb, S., Dynarski, S., McFarland, D., Morris, P., Reardon, S., & Reber, S. (2017). Descriptive Analysis  
946 in Education: A Guide for Researchers. NCEE 2017-4023. *National Center for Education*  
947 *Evaluation and Regional Assistance*.
- 948 Lopatto, D., & Tobias, S. (2010). *Science in solution: The impact of undergraduate research on student*  
949 *learning*. Council on Undergraduate Research.
- 950 McDevitt, A. L., Patel, M. V., & Ellison, A. M. (2017). Three Decades as an NSF REU Site: Lessons and  
951 Recommendations. *BioRxiv*, 162289. <https://doi.org/10.1101/162289>
- 952 Means, B., Bakia, M., & Murphy, R. (2014). *Learning online: What research tells us about whether,*  
953 *when and how*. Routledge.
- 954 Miles, M. B., Huberman, A. M., & Saldana, J. (2014). *Qualitative Data Analysis: A Methods Sourcebook*  
955 (3rd ed.). Sage Publications.
- 956 Moneta-Koehler, L., Brown, A. M., Petrie, K. A., Evans, B. J., & Chalkley, R. (2017). The Limitations of  
957 the GRE in Predicting Success in Biomedical Graduate School. *PLOS ONE*, *12*(1), e0166742.  
958 <https://doi.org/10.1371/journal.pone.0166742>
- 959 Neckers, D. C. (1982). The threat to undergraduate research. *Journal of Chemical Education*, *59*(4), 329.  
960 <https://doi.org/10.1021/ed059p329>
- 961 Page, S. E. (2008). *The Difference: How the Power of Diversity Creates Better Groups, Firms, Schools,*  
962 *and Societies*. Princeton University Press.
- 963 Palloff, R. M., & Pratt, K. (2007). *Building online learning communities: Effective strategies for the*  
964 *virtual classroom*. John Wiley & Sons.
- 965 Pfeifer, M. A., Reiter, E. M., Hendrickson, M., & Stanton, J. D. (2020). Speaking up: A model of self-  
966 advocacy for STEM undergraduates with ADHD and/or specific learning disabilities.  
967 *International Journal of STEM Education*, *7*(1), 1–21.
- 968 Qiang, Z., Obando, A. G., Chen, Y., & Ye, C. (2020). Revisiting Distance Learning Resources for  
969 Undergraduate Research and Lab Activities during COVID-19 Pandemic. *Journal of Chemical*  
970 *Education*, *97*(9), 3446–3449. <https://doi.org/10.1021/acs.jchemed.0c00609>

- 971 Ragins, B. R., & Cotton, J. L. (1999). Mentor functions and outcomes: A comparison of men and women  
972 in formal and informal mentoring relationships. *Journal of Applied Psychology*, 84(4), 529.
- 973 Rovai, A. P. (2002). Development of an instrument to measure classroom community. *The Internet and*  
974 *Higher Education*, 5(3), 197–211. [https://doi.org/10.1016/S1096-7516\(02\)00102-1](https://doi.org/10.1016/S1096-7516(02)00102-1)
- 975 Saldana, J. (2015). *The Coding Manual for Qualitative Researchers*. SAGE.
- 976 Seidel, S. B., Reggi, A. L., Schinske, J. N., Burrus, L. W., & Tanner, K. D. (2015). Beyond the Biology:  
977 A Systematic Investigation of Noncontent Instructor Talk in an Introductory Biology Course.  
978 *CBE-Life Sciences Education*, 14(4), ar43. <https://doi.org/10.1187/cbe.15-03-0049>
- 979 Simon, H. A. (1977). The structure of ill-structured problems. In *Models of discovery* (pp. 304–325).  
980 Springer.
- 981 Sue, D. W., Lin, A. I., Torino, G. C., Capodilupo, C. M., & Rivera, D. P. (2009). Racial microaggressions  
982 and difficult dialogues on race in the classroom. *Cultural Diversity and Ethnic Minority*  
983 *Psychology*, 15(2), 183.
- 984 Tanner, K., & Allen, D. (2007). Cultural Competence in the College Biology Classroom. *CBE-Life*  
985 *Sciences Education*, 6(4), 251–258. <https://doi.org/10.1187/cbe.07-09-0086>
- 986 Tanner, K. D. (2013). Structure Matters: Twenty-One Teaching Strategies to Promote Student  
987 Engagement and Cultivate Classroom Equity. *CBE-Life Sciences Education*, 12(3), 322–331.  
988 <https://doi.org/10.1187/cbe.13-06-0115>
- 989 Tienda, M. (2013). Diversity ≠ Inclusion Promoting Integration in Higher Education. *Educational*  
990 *Researcher*, 42(9), 467–475. <https://doi.org/10.3102/0013189X13516164>
- 991 Wenger, E. (1999). *Communities of Practice: Learning, Meaning, and Identity*. Cambridge University  
992 Press.
- 993
- 994
- 995

**Table 1. Characteristics of students participating in this study.** In total, 243 students participated in this study, including 164 women, 71 men, 6 individuals identifying as non-binary, and 2 not reporting a gender. There were 48 students who identified as transfer students and 70 who indicated were first generation college students (i.e., no parent or guardian completed a bachelor’s degree). Students’ racial and ethnic identities are reported, disaggregated by the number of terms (i.e., summer, quarter, or semester) they indicated participating in research prior to summer 2020. Students who identified with multiple races or ethnicities are included in all relevant counts (e.g., a student who reported as Black and Latinx are included in counts for both African American or Black students and Latinx students). Thus, counts may not sum to the totals.

| Race/ethnicity                            | Prior Research Experience |        |         |         |          |               | Total |
|-------------------------------------------|---------------------------|--------|---------|---------|----------|---------------|-------|
|                                           | None                      | 1 term | 2 terms | 3 terms | >3 terms | Not reporting |       |
| <b>African American or Black</b>          | 7                         | 7      | 7       | 4       | 11       | -             | 36    |
| <b>Asian</b>                              | 6                         | 7      | 9       | 8       | 7        | -             | 37    |
| <b>Latinx</b>                             | 10                        | 14     | 15      | 11      | 12       | -             | 62    |
| <b>Middle Eastern</b>                     | -                         | 2      | 1       | -       | 1        | -             | 4     |
| <b>Native American or Native Hawaiian</b> | 2                         | 3      | 2       | -       | 1        | -             | 8     |
| <b>White</b>                              | 19                        | 33     | 35      | 14      | 22       | -             | 123   |
| <b>Not reporting</b>                      | -                         | -      | -       | -       | 1        | 2             | 3     |
| <b>Total</b>                              | 39                        | 56     | 61      | 33      | 52       | 2             | 243   |

### Figure 1. Synchronous vs. asynchronous programming.

Students reported that their programs were structured more synchronously than asynchronously ( $M=2.5$  SD;  $SD=0.9$  with a range of 1= entirely synchronous; 5= entirely asynchronous), with several programs implementing activities entirely synchronously (programs 1, 2, 6, 10, and 19). Lack of consensus in student ratings may indicate variation in how students experienced their programs, with some engaging in more asynchronous activities than others (e.g., watching video recordings of speakers rather than live sessions). Alternatively, students may be perceiving the rating scale differently. Details about the level of synchronous vs. asynchronous programming are provided in supplemental materials. Only data from remote students are included here (i.e., no responses from in-person students in programs 22 and 23).

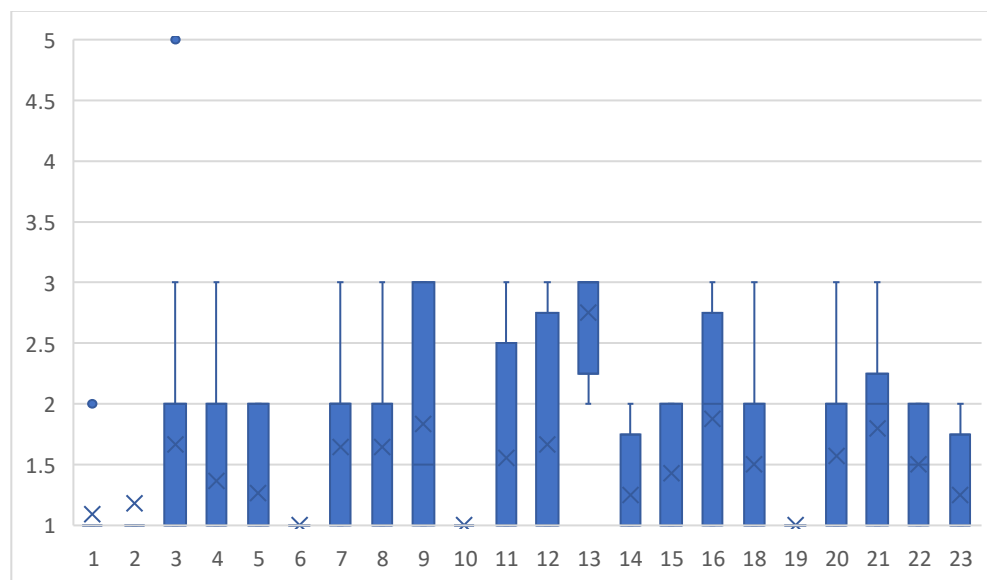



**Figure 2. Student-identified strengths and areas for improvement in remote REU sites.**

This figure provides an overview of the strengths and areas for improvement for each of the 21 programs in this study, which are numbered across the top. Programs 20 and 21 are not included here because students in these programs did not participate in focus groups. Programs 22 and 23 are separated because they included substantive in-person components. Blue indicates that the areas of strength (three most common in the top three rows). Red indicates areas in need of improvement (next two rows). Purple indicates a mixture within a program with some students emphasizing this as a strength and others as an area in need of improvement (next two rows). The bottom three rows feature themes that were mentioned by students in fewer programs. The four columns on the right are sums of how many programs had students reporting the theme as a strength, a concern, or a mix, with the total indicated how many programs had students commenting on the theme regardless of whether it was a strength or concern.

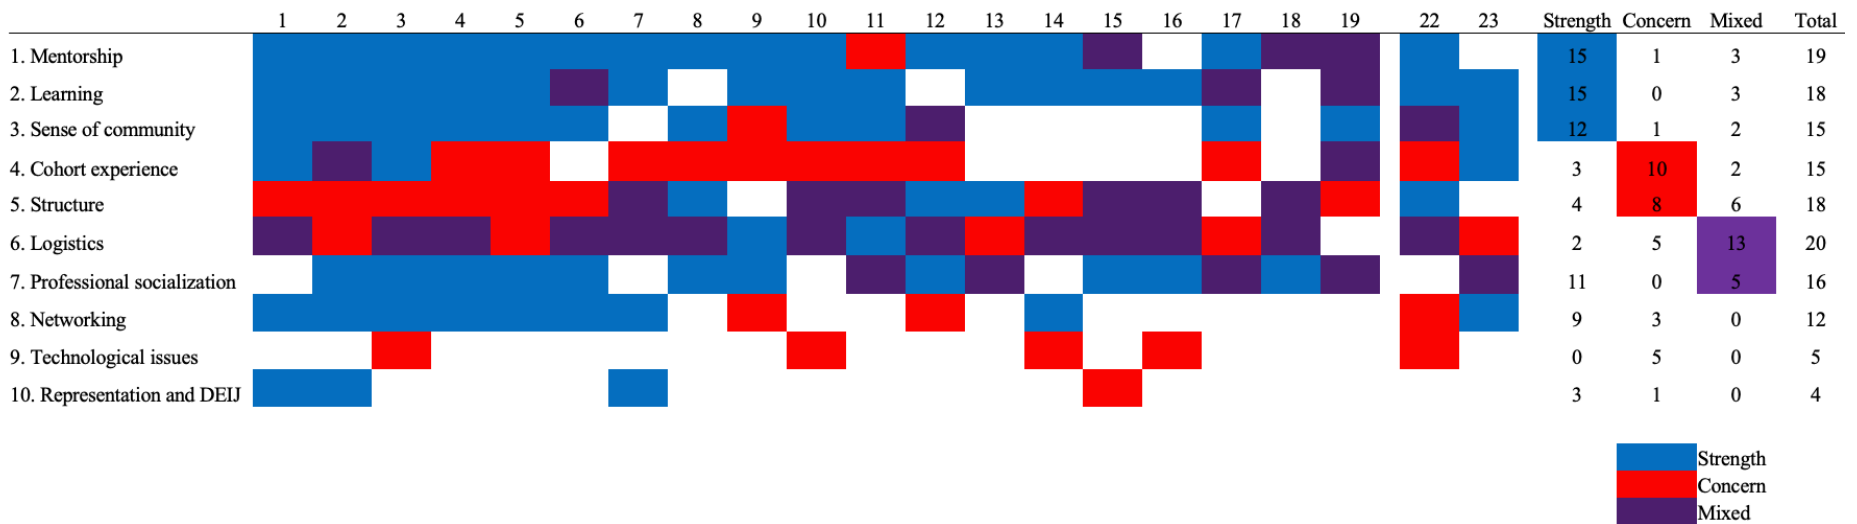

### Figure 3. Relationship quality.

For the most part, students rated their relationships with their mentors quite positively ( $M=5.3$  out of 6;  $SD=1.2$ ). This figure shows student ratings by site, with 6 indicating strong agreement and 1 indicating strong disagreement with a positive statement about relationship quality (see supplemental materials for items and rating scale). The X signifies the site mean and the bar indicates the site median. Some negative ratings were observed, which reflects the mixed or negative experiences of a small number of students. Only data from remote students are included here (i.e., no responses from in-person students in programs 22 and 23).

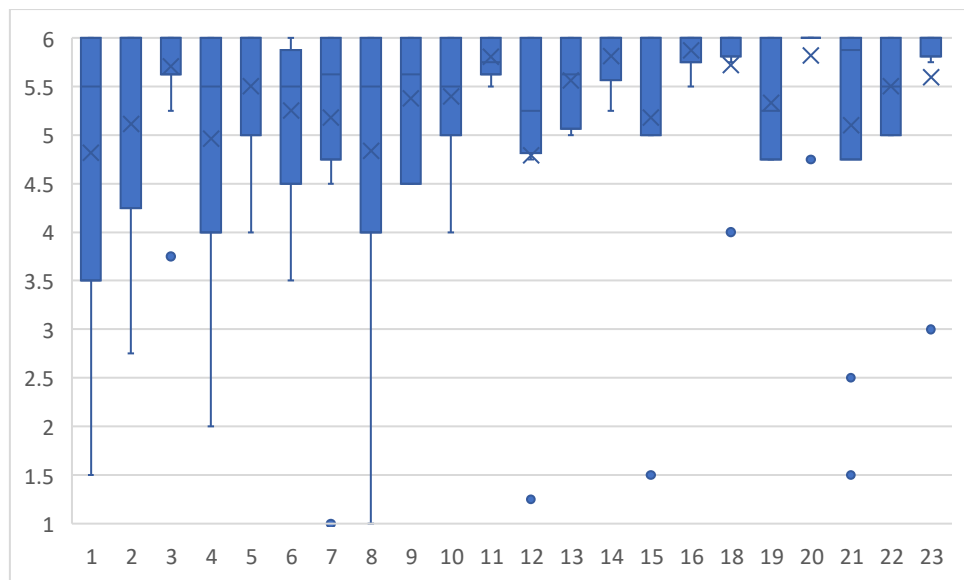

#### Figure 4. Connectedness.

Students were generally positive about the sense of connectedness they felt in their program ( $M=3.6$  out of 6;  $SD=0.6$ ), but their ratings were lower (i.e., lower means and medians) and more consistent (i.e., smaller standard deviations) within each site than ratings of their relationships with their mentors. This figure shows student ratings by site, with 6 indicating strong agreement and 1 indicating strong disagreement with a positive statement about connectedness within the program (see supplemental materials for items and rating scale). The X signifies the site mean and the bar indicates the site median. Only data from remote students are included here (i.e., no responses from in-person students in programs 22 and 23).

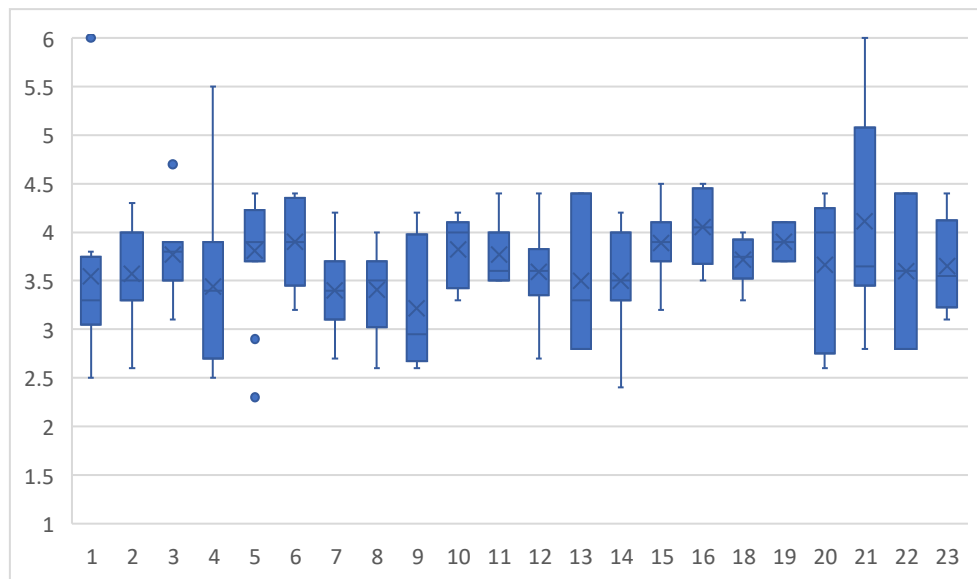

**Figure 5. Recommendations for Remote REU Sites.** During the focus groups, students offered a number of recommendations for maximizing the quality of their experiences in remote REUs, compiled here.

---

# 10 STUDENT RECOMMENDATIONS TO MAXIMIZE THE QUALITY OF REMOTE REU EXPERIENCES

---

## 1 MENTORSHIP

- Ask how students are doing in general, not solely about their research experience. If comfortable, consider disclosing some information about how you are doing in general.
- If you are unable to help your student with a problem, connect them with someone who can.
- Establish open lines of communication early on (e.g., email, Slack, text) to ensure students feel comfortable reaching out with questions at times other than during regularly scheduled meetings.
- Ask for and listen to feedback from students about how you are doing as a mentor.
- Facilitate a balance between guiding students through their projects and allowing some autonomy to direct the research and answer their own questions.

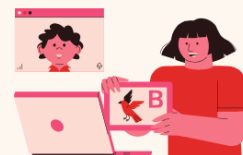

## 2 LEARNING

- Make explicit connections between what students are doing in their research and its relevance to “big picture” questions. For example, if a particular skill is used frequently in a field of a student’s interest, be sure to point out its utility.
- Give students opportunities to troubleshoot their problems on their own before providing answers or guidance.

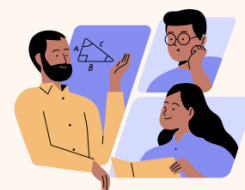

## 3 SENSE OF COMMUNITY

- Check with lab members to make sure they are willing to assist or provide guidance and then encourage collaboration within lab groups so that students feel comfortable going to anyone in the lab for help.
- Ensure that all students are aware of resources early on so they can make use of them if/when they need.
- Facilitate connections between students and other faculty or scientists in addition to their own mentors.

## 4 COHORT EXPERIENCE

- Utilize breakout rooms (or the equivalent) during meetings to give students opportunities to interact with one another.
- If possible, ensure the cohort is large enough for students to feel they are a part of something bigger than themselves.
- Hold regularly scheduled cohort meetings throughout the program, not only at the beginning.
- Facilitate informal interactions between students when possible. Consider holding synchronous, informal work time over Zoom to simulate an in-person work environment. Consider establishing a student-run Groupme or Slack for students to communicate with each other.
- Check in with students about how to structure virtual social activities to limit Zoom fatigue. Options include making these optional or holding them on days that no other meetings are scheduled.
- Facilitate open conversations on topics outside of research, such as current events, representation and DEIJ, and students’ roles in the scientific community.

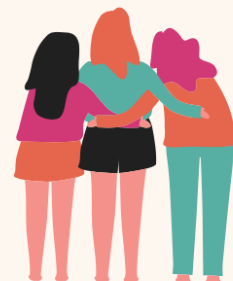

---

# 10 STUDENT RECOMMENDATIONS TO MAXIMIZE THE QUALITY OF REMOTE REU EXPERIENCES

---

## 5 STRUCTURE

- Provide a daily or weekly schedule or a suggested schedule for students, including the number of hours of work expected per day and recommended breaks to prevent burnout.
- Help students make and recognize their progress by holding check-in meetings, establishing midpoint assignments, or setting intermediate goals.
- Distribute workload evenly throughout the program.
- Schedule skill-building sessions at a time in the program when students will be able to apply what they are learning.
- Ensure mentors set aside time every day or every other day to meet with mentees.
- Provide optional tasks or recommendations for what students could do if they have extra time.
- Host one or two sessions with mentors or program leadership to share and brainstorm strategies for time management (e.g., what to do, in what order, and when to get things done by).

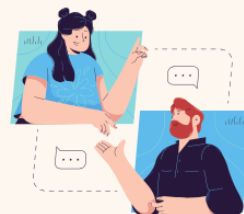

## 6 PROGRAM LOGISTICS

- Hold weekly program meetings to help establish connections and facilitate open communication.
- Be mindful of program pace. Keep consistent or slowly build up to ensure students are able to stay on track.
- Provide advanced notice of important dates and deadlines to help students gauge where they should be with their research and to give students and mentors sufficient time to plan.
- Limit the number of platforms to ease the logistics of communication.
- Ensure program leadership and mentors coordinate plans to minimize conflicts between programming and research.
- Stay within the confines of the original schedule as much as possible and minimize the number of unscheduled meetings.
- Break up lengthy online meetings to minimize Zoom fatigue.

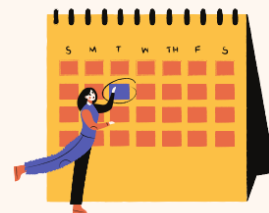

## 7 PROFESSIONAL SOCIALIZATION

- Provide opportunities for students to hear from current graduate students about their experiences in graduate school.
- Host sessions and panels highlighting a variety of research careers and the diversity of the scientific community.
- Provide information on the graduate application process and the myriad paths to graduate school.

## 8 NETWORKING

- Ensure students have ample opportunities to meet, interact, and form relationships with faculty members, graduate students, and other members of the scientific community.
- Encourage students to collaborate with mentors and peers outside of their own lab group.
- Organize cross-site activities and events.

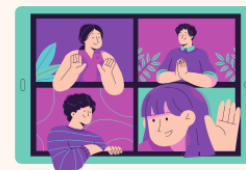



---

# 10 STUDENT RECOMMENDATIONS TO MAXIMIZE THE QUALITY OF REMOTE REU EXPERIENCES

---

## 9 TECHNOLOGICAL ISSUES

Provide all students with the necessary login credentials and access information prior to program start.

Ensure in advance that students are supplied with necessary technology such as adequate computing capacity and reliable internet access.

In computation-focused programs, such as those that involve coding, be sure to provide resources and computation-specific support to students early in the program.

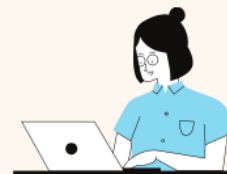

## 10 DIVERSITY, EQUITY, INCLUSION, JUSTICE AND REPRESENTATION

Provide repeated, formal and informal opportunities to discuss diversity, equity, inclusion, and social justice.

Ensure that all aspects of programs and programming include representation of individuals from backgrounds that are traditionally excluded or marginalized from the sciences.

Provide opportunities for students to hear from a wide variety of scientists and graduate school students who come from diverse backgrounds.

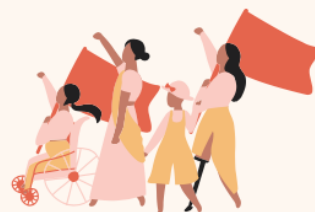

### RECOMMENDATIONS BASED ON:

Erickson et al. "How do we do this at a distance?!" A descriptive study of remote undergraduate research programs during COVID-19
